# Supplementary material
Source: PubMed Central journal article supplement (PMC5809338)

Figure S1

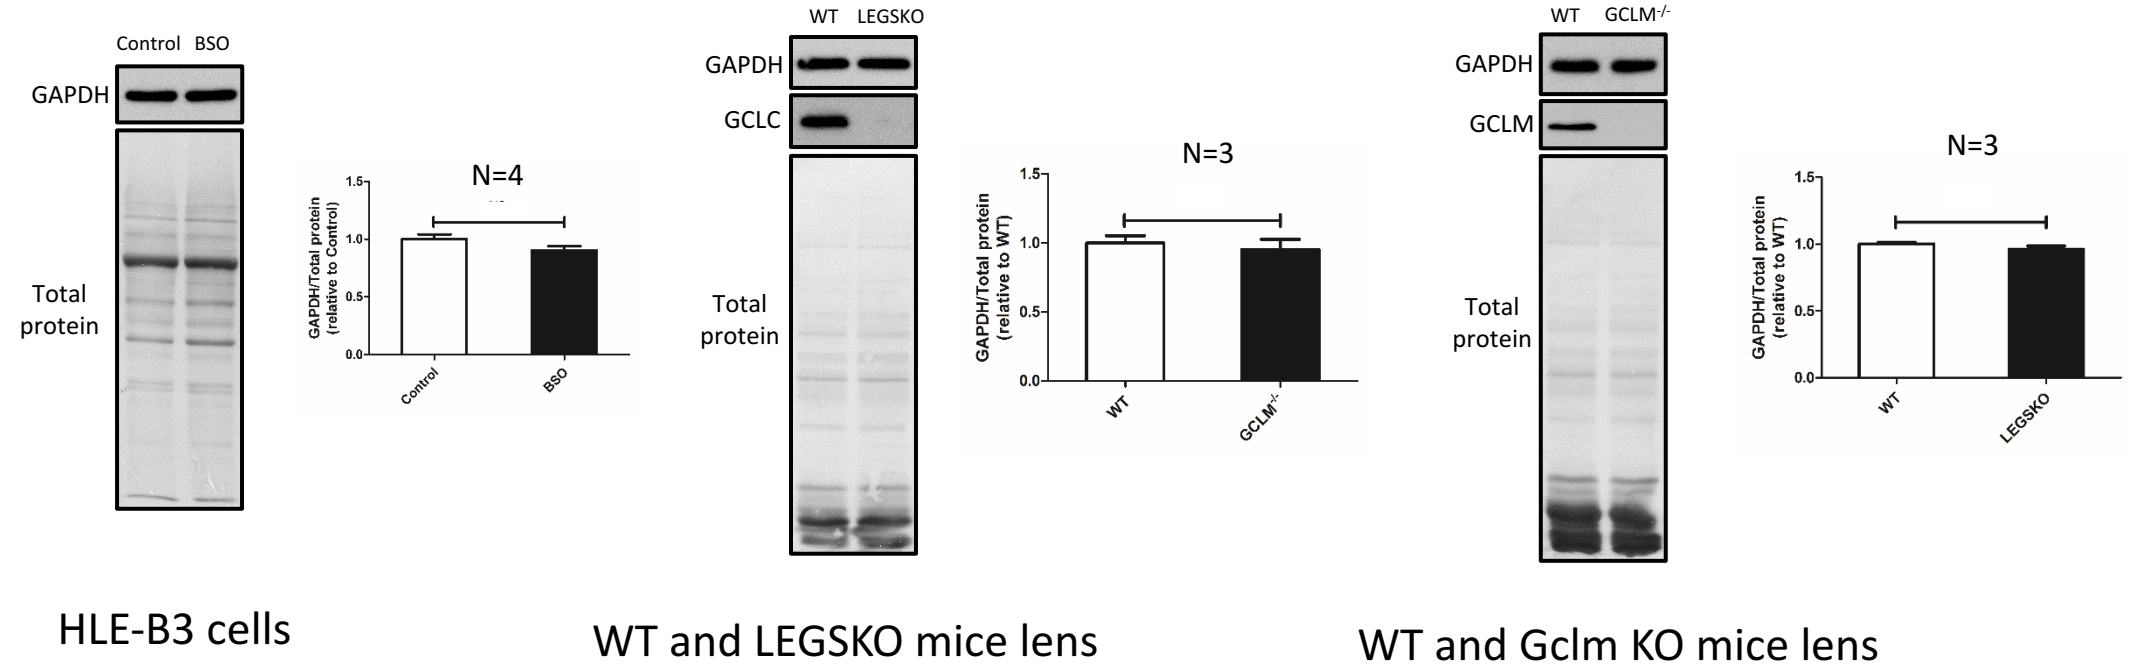

Supplement: mmc1.pdf [file mmc1.pdf]

**Figure S2**

**LEGSKO 48hr**

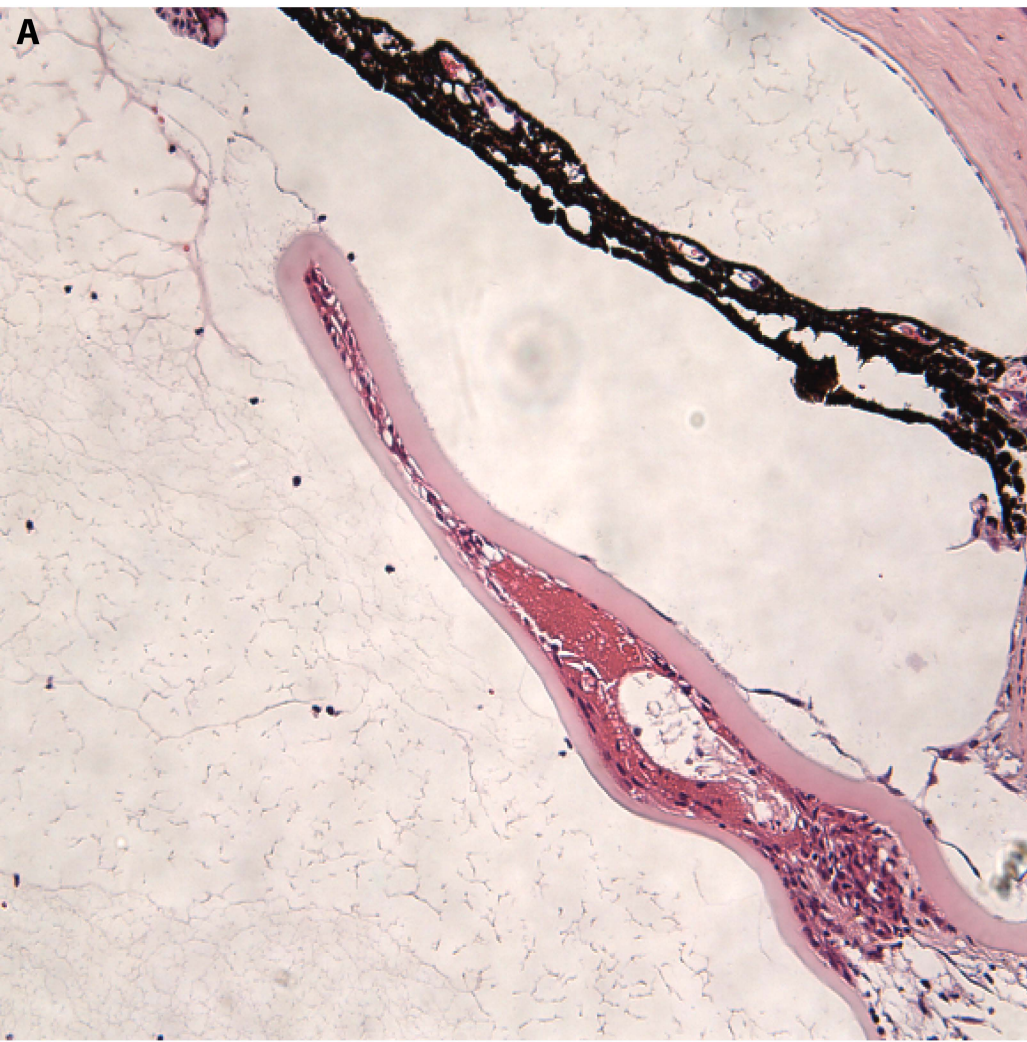

**LEGSKO 120hr**

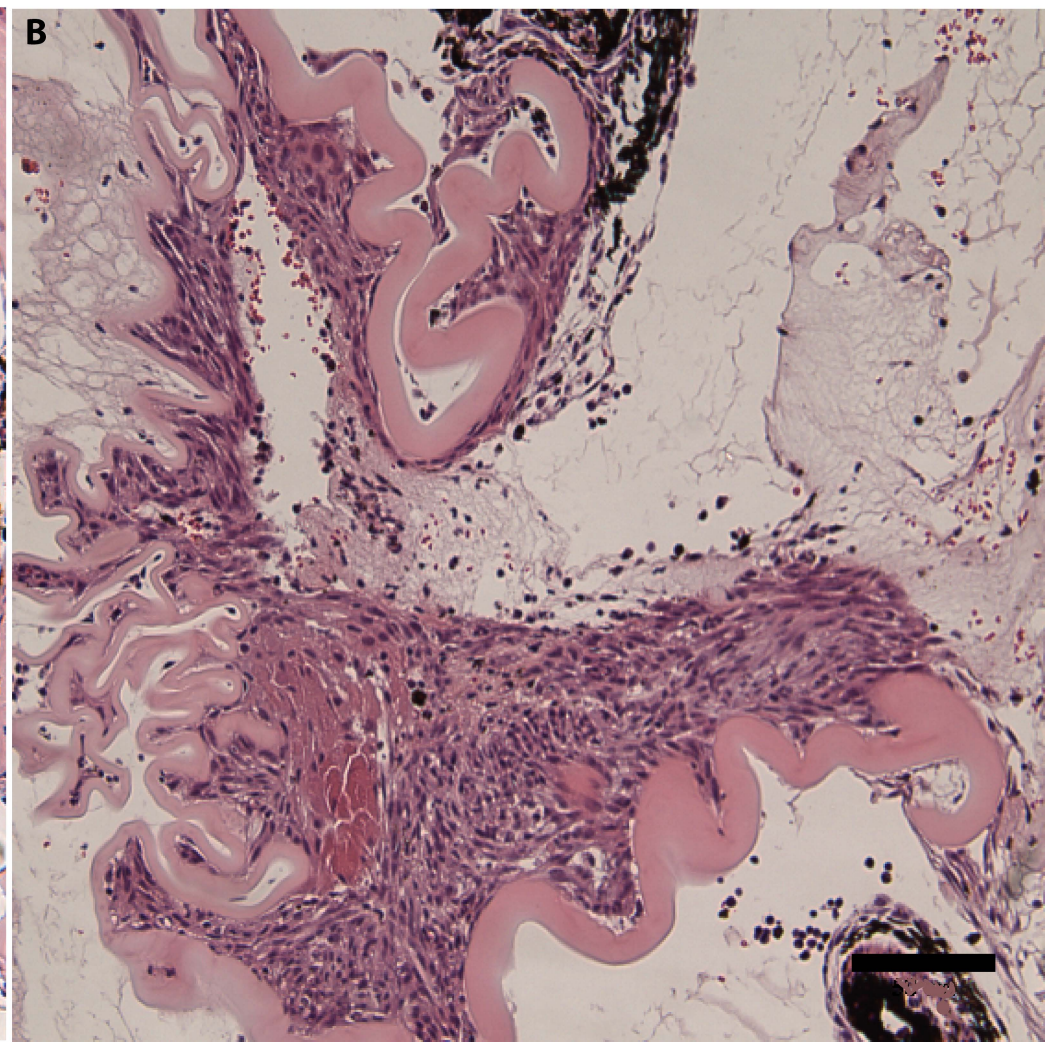

Supplement: mmc2.pdf [file mmc2.pdf]
